# Supplementary material for: Genetics of Arthrogryposis and Macroglossia in Piemontese Cattle Breed
Source: PubMed Central journal article supplement (PMC7598642; doi:10.3390/ani10101732), 2020-09-24
Supplement: animals-10-01732-s001.pdf [file animals-10-01732-s001.pdf]

Genetics of arthrogryposis and macroglossia in Piemontese cattle breed (Di Stasio *et al.*)

Figure S1. Trend of arthrogryposis and macroglossia in the Piemontese breed: incidence from 1990 to 2017.

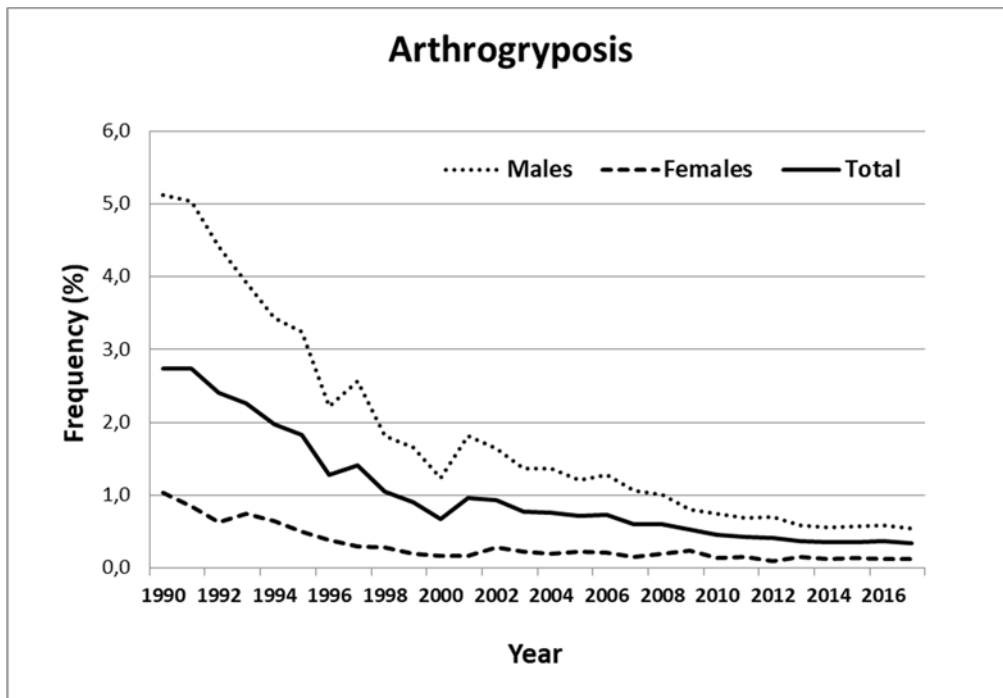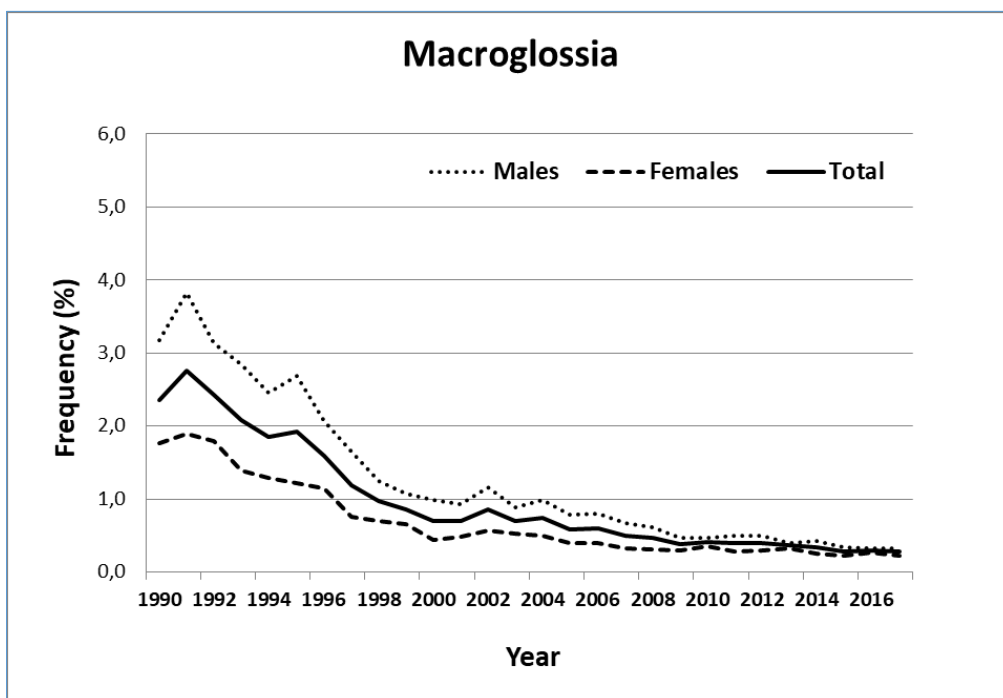

**Genetics of arthrogryposis and macroglossia in Piemontese cattle breed (Di Stasio *et al.*)**

**Figure S2.** Affected Piemontese veals: (a) arthrogryposis, (b) macroglossia

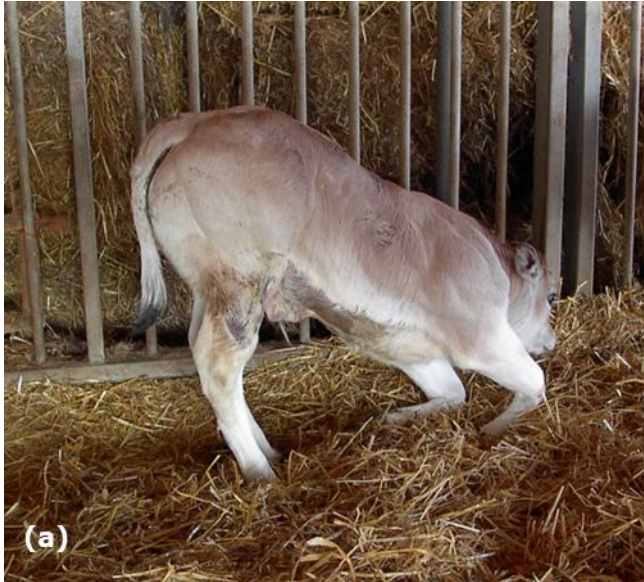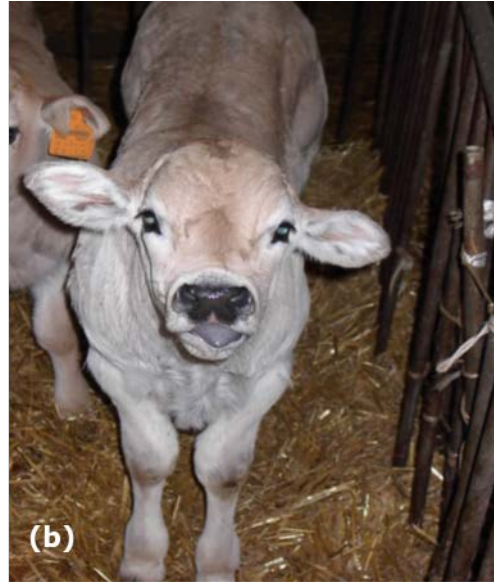

**Genetics of arthrogryposis and macroglossia in Piemontese cattle breed (Di Stasio *et al.*)**

**Figure S3.** Quantile-Quantile plot for the case-control genome-wide analysis (in red the identity line).

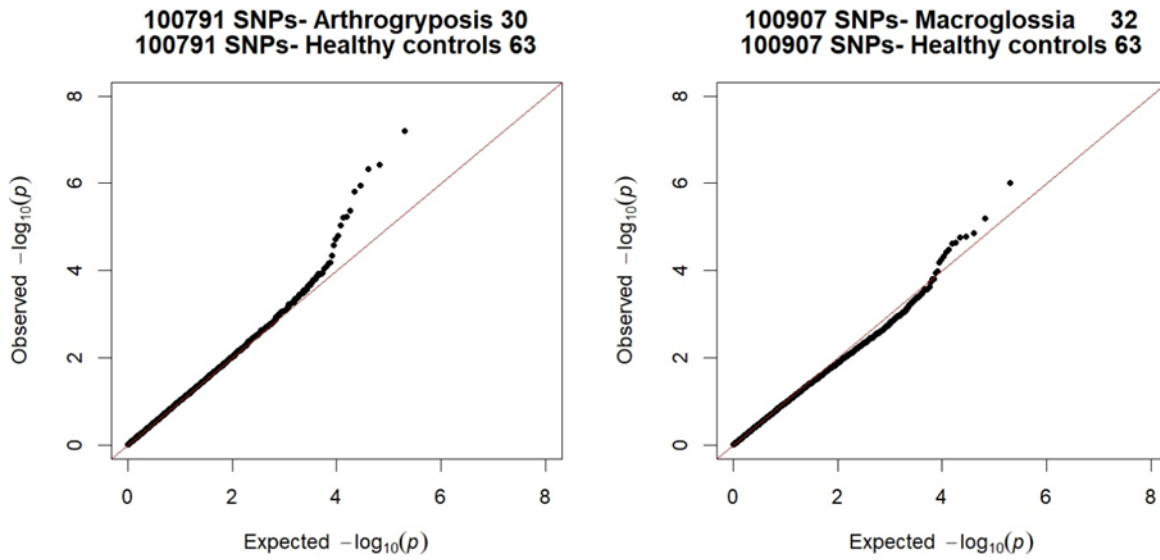

**Genetics of arthrogryposis and macroglossia in Piemontese cattle breed (Di Stasio *et al.*)**

**Figure S4.** Distribution of  $F_{ST}$  values and threshold line of the 99.9 percentile of the ranked  $F_{ST}$  values for Arthrogryposis and Macroglossia *vs* Healthy Control.

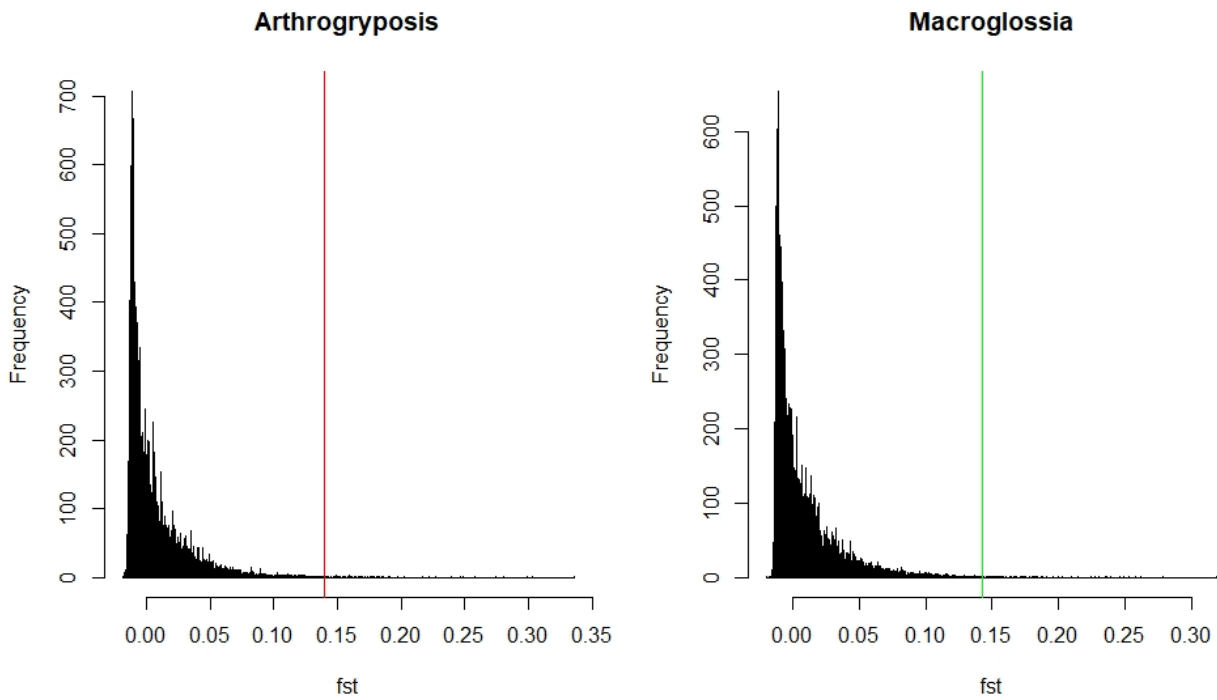

## Genetics of arthrogryposis and macroglossia in Piemontese cattle breed (Di Stasio *et al.*)

**Figure S5.** Canonical Correlation between Can1, Can2 and the original SNPs resulted significantly associated to the disease status, represented by different colors. SNPs associated to Arthrogryposis (Ar), MacroGLOSSIA (Ma) or both (Ar\_Ma).

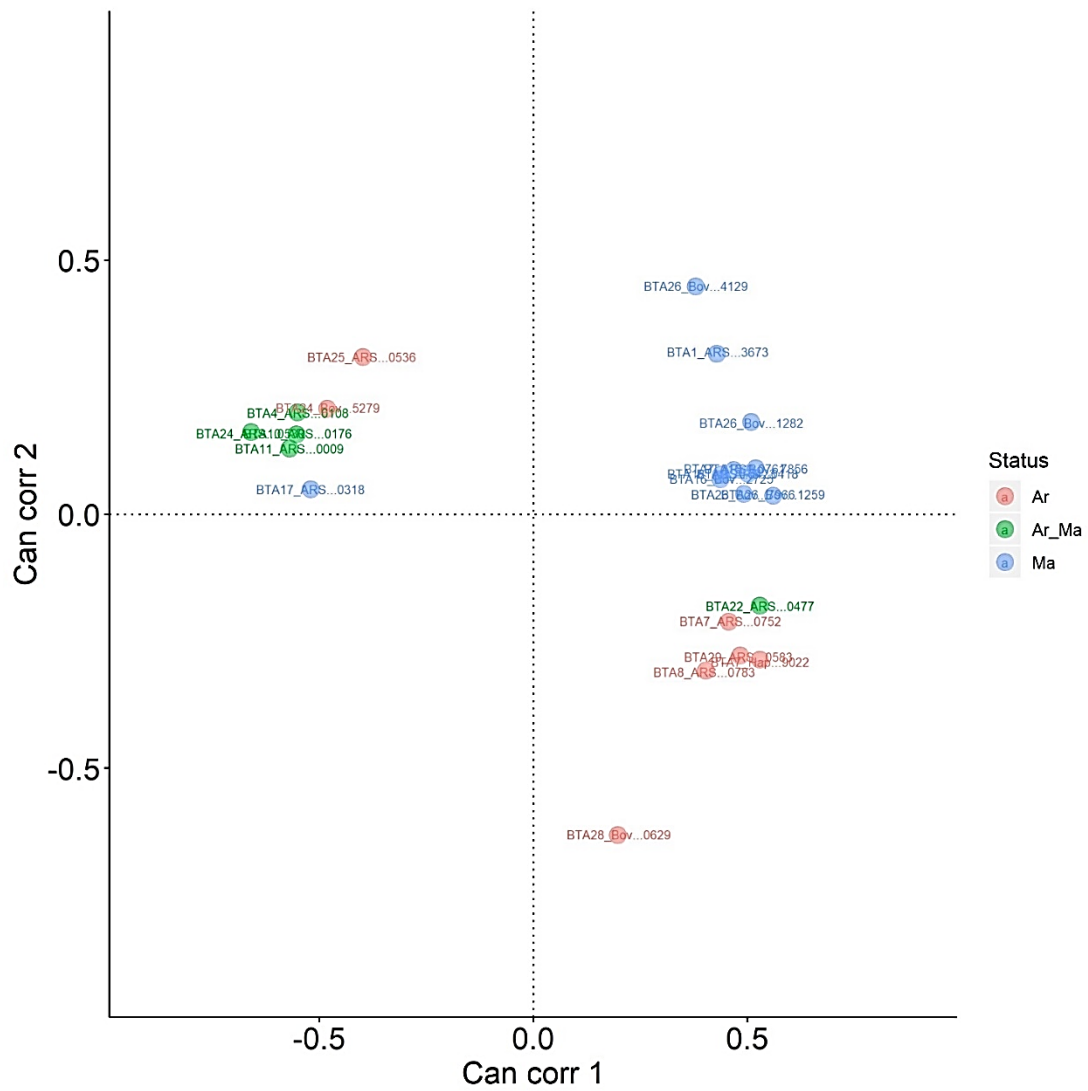

## Genetics of arthrogryposis and macroglossia in Piemontese cattle breed (Di Stasio *et al.*)

**Table S1.**  $F_{ST}$  outliers (99.9% of ranked  $F_{ST}$ , Threshold value: 0.140158) for Arthrogryposis *vs* Healthy Control comparison (n=102). The values in boldface are those significantly associated to the disease status in GWAS.

| SNP                                        | CHR       | BP               | FST             |
|--------------------------------------------|-----------|------------------|-----------------|
| ARS-USDA-AGIL-chr1-20798814-000144         | 1         | 21300919         | 0.163455        |
| Hapmap41715-BTA-100026                     | 1         | 49919784         | 0.160983        |
| BovineHD0100024372                         | 1         | 84565987         | 0.15034         |
| BovineHD4100000493                         | 1         | 84596584         | 0.148572        |
| Hapmap60166-rs29019307                     | 1         | 102616990        | 0.141233        |
| Hapmap42453-BTA-122047                     | 1         | 129168140        | 0.151814        |
| BovineHD0100042448                         | 1         | 145169000        | 0.14058         |
| BovineHD0200005190                         | 2         | 18128284         | 0.140449        |
| ARS-USDA-AGIL-chr2-25060668-000420         | 2         | 25018401         | 0.176187        |
| BovineHD0200012088                         | 2         | 41560226         | 0.160374        |
| BovineHD0200024331                         | 2         | 84953017         | 0.184895        |
| BovineHD0200024474                         | 2         | 85440417         | 0.173536        |
| BovineHD0200026587                         | 2         | 92740820         | 0.156732        |
| BovineHD0200026624                         | 2         | 92867021         | 0.149351        |
| BovineHD0200028865                         | 2         | 100065870        | 0.158446        |
| ARS-USDA-AGIL-chr3-7904866-000592          | 3         | 7907962          | 0.176345        |
| BovineHD0300006089                         | 3         | 18919831         | 0.168184        |
| BovineHD0300013514                         | 3         | 44065854         | 0.166102        |
| BovineHD0400001031                         | 4         | 4079463          | 0.142244        |
| ARS-BFGL-NGS-55059                         | 4         | 5545419          | 0.148487        |
| ARS-BFGL-NGS-6424                          | 4         | 7225482          | 0.140158        |
| BovineHD0400017527                         | 4         | 63635998         | 0.166591        |
| <b>ARS-USDA-AGIL-chr4-114395607-000108</b> | <b>4</b>  | <b>113596650</b> | <b>0.280511</b> |
| Hapmap58253-rs29024365                     | 5         | 88527468         | 0.140502        |
| BovineHD0600007417                         | 6         | 25534440         | 0.190342        |
| BovineHD0600009523                         | 6         | 32584576         | 0.164146        |
| BovineHD0600009530                         | 6         | 32611538         | 0.154925        |
| ARS-BFGL-NGS-642                           | 6         | 34239830         | 0.190845        |
| Hapmap51534-BTA-103373                     | 6         | 49974410         | 0.182351        |
| UA-IFASA-959                               | 6         | 50802477         | 0.150394        |
| <b>ARS-USDA-AGIL-chr7-12174899-000752</b>  | <b>7</b>  | <b>11085449</b>  | <b>0.227596</b> |
| BovineHD4100006148                         | 7         | 64152892         | 0.143047        |
| BTA-28678-no-rs                            | 7         | 64375368         | 0.159007        |
| BovineHD0700019344                         | 7         | 64378247         | 0.159007        |
| BTB-01105928                               | 7         | 64398006         | 0.159007        |
| <b>ARS-BFGL-NGS-80444</b>                  | <b>7</b>  | <b>82683055</b>  | <b>0.183281</b> |
| BovineHD0700025642                         | 7         | 85132424         | 0.147645        |
| <b>Hapmap44668-BTA-119022</b>              | <b>7</b>  | <b>85227970</b>  | <b>0.257593</b> |
| BovineHD0700026562                         | 7         | 88317723         | 0.147146        |
| Hapmap34237-BES3_Contig337_1046            | 7         | 90300540         | 0.163775        |
| ARS-USDA-AGIL-chr8-84099468-000783         | 8         | 82677581         | 0.274006        |
| BovineHD0800026875                         | 8         | 88876003         | 0.155003        |
| BovineHD0900012566                         | 9         | 44648448         | 0.159447        |
| <b>ARS-USDA-AGIL-chr10-25594159-000176</b> | <b>10</b> | <b>25539231</b>  | <b>0.24884</b>  |
| BovineHD1000012199                         | 10        | 39562997         | 0.148143        |
| ARS-BFGL-NGS-119395                        | 10        | 42994125         | 0.159396        |
| BovineHD1000012994                         | 10        | 43023306         | 0.159396        |

|                                            |           |                 |                 |
|--------------------------------------------|-----------|-----------------|-----------------|
| BovineHD1100000551                         | 11        | 1595594         | 0.169627        |
| BovineHD1100000556                         | 11        | 1601521         | 0.154424        |
| BovineHD1100000561                         | 11        | 1606505         | 0.154424        |
| ARS-BFGL-NGS-41117                         | 11        | 6693294         | 0.148833        |
| BovineHD1100002555                         | 11        | 6738342         | 0.16708         |
| BTB-00461926                               | 11        | 16242950        | 0.144661        |
| <b>ARS-USDA-AGIL-chr11-36809347-000009</b> | <b>11</b> | <b>36957396</b> | <b>0.246966</b> |
| Hapmap46918-BTA-105873                     | 11        | 83570038        | 0.151757        |
| BovineHD1100027823                         | 11        | 95693625        | 0.171799        |
| ARS-BFGL-NGS-5179                          | 11        | 97906954        | 0.178678        |
| ARS-BFGL-NGS-113310                        | 11        | 98633647        | 0.141385        |
| BTB-01592095                               | 12        | 66498456        | 0.197341        |
| BovineHD1200024201                         | 12        | 79674535        | 0.154692        |
| BovineHD1200025058                         | 12        | 82379113        | 0.142208        |
| ARS-USDA-AGIL-chr13-75913474-000249        | 13        | 75201557        | 0.190677        |
| BovineHD1400023269                         | 14        | 79983698        | 0.158062        |
| BovineHD1500008537                         | 15        | 31081968        | 0.141333        |
| BovineHD1600006434                         | 16        | 22370308        | 0.140784        |
| BovineHD1600006588                         | 16        | 23086489        | 0.181091        |
| BovineHD1600008113                         | 16        | 28191223        | 0.173707        |
| ARS-USDA-AGIL-chr16-56117438-000313        | 16        | 54660223        | 0.17656         |
| ARS-USDA-AGIL-chr17-6999864-000318         | 17        | 7013884         | 0.18112         |
| BovineHD1700007933                         | 17        | 27486221        | 0.148445        |
| Hapmap34511-BES2_Contig398_735             | 17        | 46836856        | 0.142158        |
| ARS-USDA-AGIL-chr17-74081633-000036        | 17        | 72089995        | 0.154692        |
| BovineHD1800002506                         | 18        | 7129817         | 0.140158        |
| BTA-08388-no-rs                            | 19        | 55502869        | 0.141078        |
| BovineHD1900015846                         | 19        | 55506254        | 0.141078        |
| ARS-BFGL-NGS-69971                         | 20        | 43159533        | 0.202495        |
| BTB-00788635                               | 20        | 53721563        | 0.185644        |
| ARS-BFGL-NGS-111615                        | 20        | 61971945        | 0.149399        |
| BovineHD2000017478                         | 20        | 61980304        | 0.149399        |
| BovineHD2000017481                         | 20        | 61992013        | 0.178033        |
| BovineHD4100014890                         | 20        | 68194875        | 0.148907        |
| BovineHD2200002328                         | 22        | 7706294         | 0.168608        |
| BovineHD2200004208                         | 22        | 14329021        | 0.14866         |
| BovineHD2200004379                         | 22        | 14363195        | 0.14866         |
| BovineHD2200004382                         | 22        | 14365532        | 0.14866         |
| BovineHD2200004615                         | 22        | 15305029        | 0.15234         |
| BovineHD2200005234                         | 22        | 18212564        | 0.160429        |
| <b>ARS-USDA-AGIL-chr22-32285822-000477</b> | <b>22</b> | <b>32169050</b> | <b>0.302963</b> |
| BovineHD2300013637                         | 23        | 47140220        | 0.142462        |
| BovineHD2300014310                         | 23        | 49251604        | 0.143201        |
| <b>ARS-USDA-AGIL-chr24-25995108-000530</b> | <b>24</b> | <b>25684356</b> | <b>0.335929</b> |
| BovineHD2400012922                         | 24        | 46208577        | 0.146954        |
| <b>BovineHD2400015248</b>                  | <b>24</b> | <b>53199984</b> | <b>0.174055</b> |
| BovineHD2400015279                         | 24        | 53288962        | 0.216671        |
| BTA-58706-no-rs                            | 24        | 56368404        | 0.197316        |
| <b>ARS-USDA-AGIL-chr25-1930875-000536</b>  | <b>25</b> | <b>1929340</b>  | <b>0.222049</b> |
| BovineHD2500008188                         | 25        | 29223697        | 0.16096         |
| BovineHD2600011259                         | 26        | 40460199        | 0.151322        |
| <b>BovineHD2800000629</b>                  | <b>28</b> | <b>2661658</b>  | <b>0.239498</b> |
| <b>ARS-USDA-AGIL-chr29-39842168-000583</b> | <b>29</b> | <b>39215494</b> | <b>0.299438</b> |
| ARS-BFGL-NGS-89746                         | 29        | 48833336        | 0.169848        |
| BovineHD2900014578                         | 29        | 48869098        | 0.15995         |





## Genetics of arthrogryposis and macroglossia in Piemontese cattle breed (Di Stasio *et al.*)

**Table S2.**  $F_{ST}$  outliers (99.9% of ranked  $F_{ST}$ , Threshold value: 0.1425518) from MacroGLOSSIA vs Healthy Control comparison (n=101). The values in boldface are those significantly associated to the disease status in GWAS.

| SNP                                        | CHR       | BP               | FST             |
|--------------------------------------------|-----------|------------------|-----------------|
| BovineHD0100002309                         | 1         | 7654936          | 0.171235        |
| ARS-USDA-AGIL-chr1-20798814-000144         | 1         | 21300919         | 0.167485        |
| BovineHD0100009188                         | 1         | 31896161         | 0.195778        |
| <b>ARS-BFGL-NGS-13673</b>                  | <b>1</b>  | <b>86784250</b>  | <b>0.213922</b> |
| BovineHD0100028911                         | 1         | 100485690        | 0.147867        |
| BTA-109427-no-rs                           | 1         | 108225670        | 0.160244        |
| BovineHD0100046611                         | 1         | 134961350        | 0.155866        |
| <b>ARS-USDA-AGIL-chr2-17084934-000418</b>  | <b>2</b>  | <b>17077000</b>  | <b>0.248413</b> |
| BovineHD0200010478                         | 2         | 35606140         | 0.151773        |
| BTB-01246228                               | 2         | 35622796         | 0.151773        |
| BTB-00295753                               | 2         | 35722982         | 0.153158        |
| ARS-BFGL-NGS-18591                         | 2         | 44081015         | 0.157688        |
| BTB-00183404                               | 2         | 54608036         | 0.15455         |
| BovineHD0200019365                         | 2         | 66617723         | 0.158714        |
| BovineHD0200019662                         | 2         | 67729511         | 0.165908        |
| BovineHD0200019919                         | 2         | 68638010         | 0.160298        |
| BovineHD0200019935                         | 2         | 68711981         | 0.181503        |
| BovineHD0200019945                         | 2         | 68757260         | 0.148421        |
| ARS-BFGL-NGS-105016                        | 2         | 69929788         | 0.172882        |
| BovineHD0200020580                         | 2         | 71325436         | 0.143988        |
| BovineHD0200030786                         | 2         | 106185590        | 0.190708        |
| BovineHD0200032009                         | 2         | 110303270        | 0.187975        |
| BovineHD0200032928                         | 2         | 113239520        | 0.156383        |
| BovineHD0300011574                         | 3         | 37209678         | 0.156139        |
| BovineHD0300014636                         | 3         | 48006297         | 0.146695        |
| BovineHD0300016810                         | 3         | 55490893         | 0.145606        |
| BTB-00156546                               | 3         | 110260420        | 0.163243        |
| BovineHD0400001564                         | 4         | 5558293          | 0.172678        |
| ARS-USDA-AGIL-chr4-66003777-000640         | 4         | 65605611         | 0.183037        |
| BovineHD0400018125                         | 4         | 65649876         | 0.166029        |
| <b>ARS-USDA-AGIL-chr4-114395607-000108</b> | <b>4</b>  | <b>113596650</b> | <b>0.199883</b> |
| ARS-USDA-AGIL-chr5-58067406-000679         | 5         | 57741083         | 0.155274        |
| BovineHD0500024333                         | 5         | 85511462         | 0.163243        |
| BovineHD0600007417                         | 6         | 25534440         | 0.164243        |
| BovineHD0600034042                         | 6         | 114186020        | 0.178356        |
| BovineHD0700032903                         | 7         | 8466147          | 0.167743        |
| ARS-USDA-AGIL-chr7-12174899-000752         | 7         | 11085449         | 0.145395        |
| ARS-USDA-AGIL-chr7-18201332-000761         | 7         | 16970401         | 0.227314        |
| ARS-BFGL-NGS-76969                         | 7         | 22273701         | 0.150336        |
| BTB-00300946                               | 7         | 22318140         | 0.150336        |
| BovineHD0800004691                         | 8         | 15068593         | 0.152569        |
| BovineHD0900012413                         | 9         | 44165518         | 0.14631         |
| BovineHD0900012426                         | 9         | 44210242         | 0.152872        |
| BovineHD0900013157                         | 9         | 47142867         | 0.17341         |
| <b>ARS-USDA-AGIL-chr10-25594159-000176</b> | <b>10</b> | <b>25539231</b>  | <b>0.209432</b> |
| ARS-BFGL-NGS-3998                          | 10        | 76862396         | 0.190779        |
| BovineHD1100006675                         | 11        | 22104302         | 0.178071        |

|                                            |           |                 |                 |
|--------------------------------------------|-----------|-----------------|-----------------|
| <b>ARS-USDA-AGIL-chr11-36809347-000009</b> | <b>11</b> | <b>36957396</b> | <b>0.238806</b> |
| BovineHD1100014525                         | 11        | 49639983        | 0.150463        |
| UA-IFASA-8854                              | 11        | 49640162        | 0.180605        |
| BovineHD1200001210                         | 12        | 4031682         | 0.15694         |
| BovineHD1300006670                         | 13        | 22520015        | 0.174371        |
| BovineHD1300009628                         | 13        | 32729625        | 0.151251        |
| ARS-USDA-AGIL-chr13-75913474-000249        | 13        | 75201557        | 0.147333        |
| ARS-BFGL-NGS-23787                         | 13        | 75318964        | 0.183593        |
| BovineHD1300024267                         | 13        | 82633098        | 0.168178        |
| BovineHD1400012961                         | 14        | 43721075        | 0.166297        |
| BovineHD1500002753                         | 15        | 10356099        | 0.143747        |
| BovineHD1500003530                         | 15        | 14060730        | 0.147771        |
| BovineHD1500005214                         | 15        | 20276441        | 0.149421        |
| Hapmap41518-BTA-36331                      | 15        | 31693526        | 0.187738        |
| Hapmap47270-BTA-36334                      | 15        | 31736591        | 0.187738        |
| BovineHD1500024160                         | 15        | 81377169        | 0.175028        |
| BovineHD1600000186                         | 16        | 1003557         | 0.146727        |
| <b>BovineHD1600007856</b>                  | <b>16</b> | <b>27494192</b> | <b>0.261461</b> |
| ARS-USDA-AGIL-chr16-56117438-000313        | 16        | 54660223        | 0.157241        |
| <b>ARS-BFGL-NGS-15423</b>                  | <b>16</b> | <b>72258249</b> | <b>0.252403</b> |
| <b>BovineHD4100012725</b>                  | <b>16</b> | <b>72266300</b> | <b>0.229767</b> |
| <b>ARS-USDA-AGIL-chr17-6999864-000318</b>  | <b>17</b> | <b>7013884</b>  | <b>0.235469</b> |
| ARS-BFGL-NGS-103372                        | 18        | 8716520         | 0.174845        |
| BovineHD1900005248                         | 19        | 17986878        | 0.145586        |
| BovineHD1900006972                         | 19        | 23611776        | 0.144014        |
| ARS-BFGL-BAC-31839                         | 19        | 24200990        | 0.153827        |
| BovineHD1900007478                         | 19        | 24895443        | 0.146071        |
| BovineHD1900011893                         | 19        | 41082405        | 0.158346        |
| BovineHD1900014271                         | 19        | 50510410        | 0.145452        |
| ARS-BFGL-NGS-102633                        | 20        | 65154115        | 0.142608        |
| BovineHD2100000329                         | 21        | 2457572         | 0.148012        |
| BovineHD2100000332                         | 21        | 2498610         | 0.148012        |
| BovineHD2100007679                         | 21        | 26142023        | 0.151512        |
| BovineHD2100019350                         | 21        | 64347656        | 0.145413        |
| BovineHD2200000496                         | 22        | 1893009         | 0.179981        |
| <b>ARS-USDA-AGIL-chr22-32285822-000477</b> | <b>22</b> | <b>32169050</b> | <b>0.245891</b> |
| ARS-USDA-AGIL-chr22-57797674-000484        | 22        | 57141089        | 0.180697        |
| <b>ARS-USDA-AGIL-chr24-25995108-000530</b> | <b>24</b> | <b>25684356</b> | <b>0.318801</b> |
| BovineHD2500008188                         | 25        | 29223697        | 0.150009        |
| BovineHD2500008631                         | 25        | 31063416        | 0.151453        |
| BovineHD2500010631                         | 25        | 37577205        | 0.143663        |
| ARS-BFGL-NGS-63916                         | 26        | 34158439        | 0.160509        |
| ARS-BFGL-NGS-43058                         | 26        | 37139478        | 0.143914        |
| <b>BovineHD4100017966</b>                  | <b>26</b> | <b>40441709</b> | <b>0.202795</b> |
| <b>BovineHD2600011259</b>                  | <b>26</b> | <b>40460199</b> | <b>0.278343</b> |
| <b>BovineHD2600011282</b>                  | <b>26</b> | <b>40517972</b> | <b>0.257321</b> |
| BovineHD2600011355                         | 26        | 40772885        | 0.187073        |
| BovineHD2600011508                         | 26        | 41287739        | 0.15389         |
| Hapmap39279-BTA-61630                      | 26        | 42800673        | 0.154816        |
| BovineHD2600013896                         | 26        | 47886423        | 0.172018        |
| <b>BovineHD2600014129</b>                  | <b>26</b> | <b>48680201</b> | <b>0.224353</b> |
| BovineHD2600005868                         | 26        | 51261037        | 0.178441        |
| ARS-USDA-AGIL-chr29-39842168-000583        | 29        | 39215494        | 0.154244        |
| BovineHD2900014776                         | 29        | 49812895        | 0.160252        |



## Genetics of arthrogryposis and macroglossia in Piemontese cattle breed (Di Stasio *et al.*)

**Table S3.** Statistics of the significant markers in common between GWAS and  $F_{ST}$  analysis

| Pathology      | SNP                                         | BP        | BTA | N  | A1 | A2 | Pvalue<br>HWE | MAF  | MAF<br>Affected | MAF<br>Unaffected | Nominal<br>p-values | GC-<br>pvalue | FDR (BH) | F <sub>ST</sub> |
|----------------|---------------------------------------------|-----------|-----|----|----|----|---------------|------|-----------------|-------------------|---------------------|---------------|----------|-----------------|
| Arthrogryposis | <b>ARS-USDA-AGIL-chr4-114395607-000108*</b> | 113596650 | 4   | 93 | A  | G  | 7.69E-05      | 0.29 | 0.03            | 0.41              | 9.91E-08            | 1.12E-06      | 2.50E-03 | 0.281           |
| Arthrogryposis | ARS-USDA-AGIL-chr7-12174899-000752          | 11085449  | 7   | 93 | A  | G  | 4.06E-02      | 0.24 | 0.45            | 0.13              | 2.28E-06            | 1.56E-05      | 2.30E-02 | 0.228           |
| Arthrogryposis | Hapmap44668-BTA-119022                      | 85227970  | 7   | 93 | A  | G  | 8.22E-01      | 0.36 | 0.62            | 0.24              | 4.97E-07            | 4.34E-06      | 8.35E-03 | 0.258           |
| Arthrogryposis | ARS-USDA-AGIL-chr8-84099468-000783          | 82677581  | 8   | 93 | A  | G  | 1.83E-03      | 0.14 | 0.33            | 0.05              | 1.50E-07            | 1.58E-06      | 3.02E-03 | 0.274           |
| Arthrogryposis | <b>ARS-USDA-AGIL-chr10-25594159-000176*</b> | 25539231  | 10  | 93 | G  | A  | 2.12E-01      | 0.46 | 0.20            | 0.59              | 7.33E-07            | 6.01E-06      | 9.24E-03 | 0.249           |
| Arthrogryposis | <b>ARS-USDA-AGIL-chr11-36809347-000009*</b> | 36957396  | 11  | 93 | A  | C  | 1.68E-03      | 0.37 | 0.12            | 0.49              | 7.26E-07            | 5.96E-06      | 9.24E-03 | 0.247           |
| Arthrogryposis | <b>ARS-USDA-AGIL-chr22-32285822-000477*</b> | 32169050  | 22  | 93 | A  | G  | 6.27E-04      | 0.26 | 0.52            | 0.13              | 2.67E-08            | 3.71E-07      | 1.17E-03 | 0.303           |
| Arthrogryposis | <b>ARS-USDA-AGIL-chr24-25995108-000530*</b> | 25684356  | 24  | 93 | A  | C  | 1.23E-05      | 0.31 | 0.02            | 0.44              | 3.31E-09            | 6.44E-08      | 3.33E-04 | 0.336           |
| Arthrogryposis | BovineHD2400015279                          | 53288962  | 24  | 93 | G  | A  | 1.46E-01      | 0.49 | 0.73            | 0.37              | 4.32E-06            | 2.67E-05      | 3.63E-02 | 0.217           |
| Arthrogryposis | ARS-USDA-AGIL-chr25-1930875-000536          | 1929340   | 25  | 93 | G  | A  | 4.44E-03      | 0.39 | 0.15            | 0.51              | 2.96E-06            | 1.95E-05      | 2.72E-02 | 0.222           |
| Arthrogryposis | BovineHD2800000629                          | 2661658   | 28  | 93 | C  | A  | 1.34E-01      | 0.17 | 0.37            | 0.08              | 1.22E-06            | 9.20E-06      | 1.36E-02 | 0.239           |
| Arthrogryposis | ARS-USDA-AGIL-chr29-39842168-000583         | 39215494  | 29  | 93 | A  | T  | 6.74E-03      | 0.31 | 0.58            | 0.18              | 3.47E-08            | 4.63E-07      | 1.17E-03 | 0.299           |
| Macroglossia   | ARS-BFGL-NGS-13673                          | 86784250  | 1   | 95 | A  | C  | 1.00E+00      | 0.11 | 0.25            | 0.03              | 3.60E-06            | 1.05E-04      | 2.80E-02 | 0.214           |
| Macroglossia   | ARS-USDA-AGIL-chr2-17084934-000418          | 17077000  | 2   | 95 | A  | G  | 3.94E-02      | 0.45 | 0.70            | 0.32              | 4.35E-07            | 2.32E-05      | 6.70E-03 | 0.248           |
| Macroglossia   | <b>ARS-USDA-AGIL-chr4-114395607-000108*</b> | 113596650 | 4   | 95 | A  | G  | 6.86E-04      | 0.31 | 0.09            | 0.41              | 6.42E-06            | 1.58E-04      | 4.05E-02 | 0.200           |
| Macroglossia   | ARS-USDA-AGIL-chr7-18201332-000761          | 16970401  | 7   | 95 | C  | A  | 1.94E-01      | 0.13 | 0.30            | 0.05              | 1.56E-06            | 5.75E-05      | 1.43E-02 | 0.227           |
| Macroglossia   | <b>ARS-USDA-AGIL-chr10-25594159-000176*</b> | 25539231  | 10  | 95 | G  | A  | 3.91E-02      | 0.47 | 0.23            | 0.59              | 4.07E-06            | 1.14E-04      | 2.94E-02 | 0.209           |
| Macroglossia   | <b>ARS-USDA-AGIL-chr11-36809347-000009*</b> | 36957396  | 11  | 95 | A  | C  | 1.95E-03      | 0.37 | 0.13            | 0.49              | 7.14E-07            | 3.30E-05      | 9.01E-03 | 0.239           |
| Macroglossia   | ARS-BFGL-NGS-15423                          | 72258249  | 16  | 95 | G  | A  | 4.35E-05      | 0.22 | 0.44            | 0.11              | 2.99E-07            | 1.78E-05      | 6.03E-03 | 0.252           |
| Macroglossia   | BovineHD1600007856                          | 27494192  | 16  | 95 | A  | G  | 4.45E-01      | 0.28 | 0.52            | 0.16              | 2.17E-07            | 1.42E-05      | 6.03E-03 | 0.261           |
| Macroglossia   | BovineHD4100012725                          | 72266300  | 16  | 95 | A  | G  | 1.09E-03      | 0.19 | 0.39            | 0.10              | 1.18E-06            | 4.71E-05      | 1.19E-02 | 0.230           |
| Macroglossia   | ARS-USDA-AGIL-chr17-6999864-000318          | 7013884   | 17  | 95 | G  | A  | 4.14E-04      | 0.45 | 0.20            | 0.58              | 8.46E-07            | 3.73E-05      | 9.49E-03 | 0.235           |
| Macroglossia   | <b>ARS-USDA-AGIL-chr22-32285822-000477*</b> | 32169050  | 22  | 95 | A  | G  | 1.49E-03      | 0.25 | 0.47            | 0.13              | 4.65E-07            | 2.43E-05      | 6.70E-03 | 0.246           |
| Macroglossia   | <b>ARS-USDA-AGIL-chr24-25995108-000530*</b> | 25684356  | 24  | 95 | A  | C  | 1.69E-05      | 0.31 | 0.03            | 0.44              | 5.06E-09            | 9.83E-07      | 5.10E-04 | 0.319           |
| Macroglossia   | BovineHD2600011259                          | 40460199  | 26  | 95 | A  | G  | 3.54E-02      | 0.43 | 0.70            | 0.29              | 7.21E-08            | 6.47E-06      | 3.64E-03 | 0.278           |
| Macroglossia   | BovineHD2600011282                          | 40517972  | 26  | 95 | G  | A  | 2.17E-01      | 0.46 | 0.72            | 0.33              | 2.70E-07            | 1.65E-05      | 6.03E-03 | 0.257           |
| Macroglossia   | BovineHD2600014129                          | 48680201  | 26  | 95 | G  | A  | 8.05E-01      | 0.29 | 0.52            | 0.18              | 1.94E-06            | 6.73E-05      | 1.63E-02 | 0.224           |
| Macroglossia   | BovineHD4100017966                          | 40441709  | 26  | 95 | A  | G  | 5.02E-01      | 0.36 | 0.58            | 0.25              | 6.39E-06            | 1.57E-04      | 4.05E-02 | 0.203           |

\* In common between the two pathologies

\* shared by the two syndromes



**Genetics of arthrogryposis and macroglossia in Piemontese cattle breed (Di Stasio *et al.*)**

**Table S4:** Quadratic Distance between animals affected and healthy control for each comparison.

| Disease Status       | Ar | Ma      | He       |
|----------------------|----|---------|----------|
| Arthrogryposis (Ar)  | -  | 7.83*** | 7.99***  |
| Macroglossia (Ma)    |    |         | 14.14*** |
| Healthy control (He) |    |         | -        |

\*\*\*significance of Mahalanobis distance between compared groups ( $p$ -values <0.001)
